# Supplementary material for: Integrated Computational Tools for Identification of CCR5 Antagonists as Potential HIV-1 Entry Inhibitors: Homology Modeling, Virtual Screening, Molecular Dynamics Simulations and 3D QSAR Analysis
Source: PubMed Central journal article supplement (PMC6270745; doi:10.3390/molecules19045243), 2014-04-23

## Supplementary Information

Figure S1. The reference drug (Maraviroc) bound to CCR5 was subjected to 1 ns MD simulations.

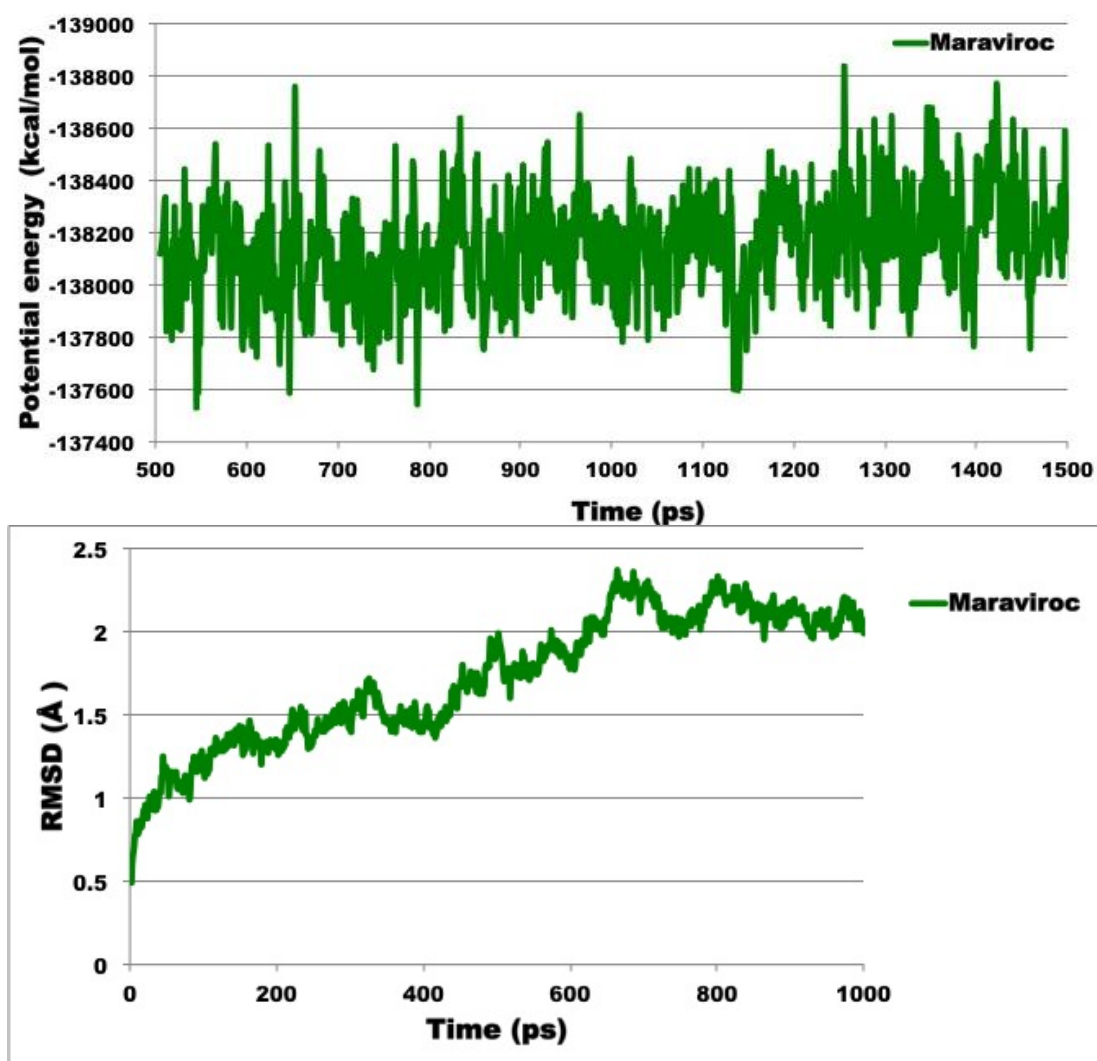

Supplement: molecules-19-05243-s001.pdf [file molecules-19-05243-s001.pdf]
